# Supplementary material
Source: ML conference proceedings conference paper supplement (https://proceedings.neurips.cc/paper_files/paper/2023/hash/ad72633e034990a97e878fc2fc100afb-Abstract.html)
Supplement: Supplementary file 1 [file ad72633e034990a97e878fc2fc100afb-Supplemental-Conference.zip]

Archive with 2 entries (2 files):
- Supplementary/ConPE.tar
- Supplementary/MetaPrompt_ConPe_v1_NeurIPS_CameraReady_Appendix.pdf
